# Supplementary material for: CircNFIB inhibits tumor growth and metastasis through suppressing MEK1/ERK signaling in intrahepatic cholangiocarcinoma
Source: PubMed Central journal article supplement (PMC8762882; doi:10.1186/s12943-021-01482-9), 2022-01-17

**Figure S4**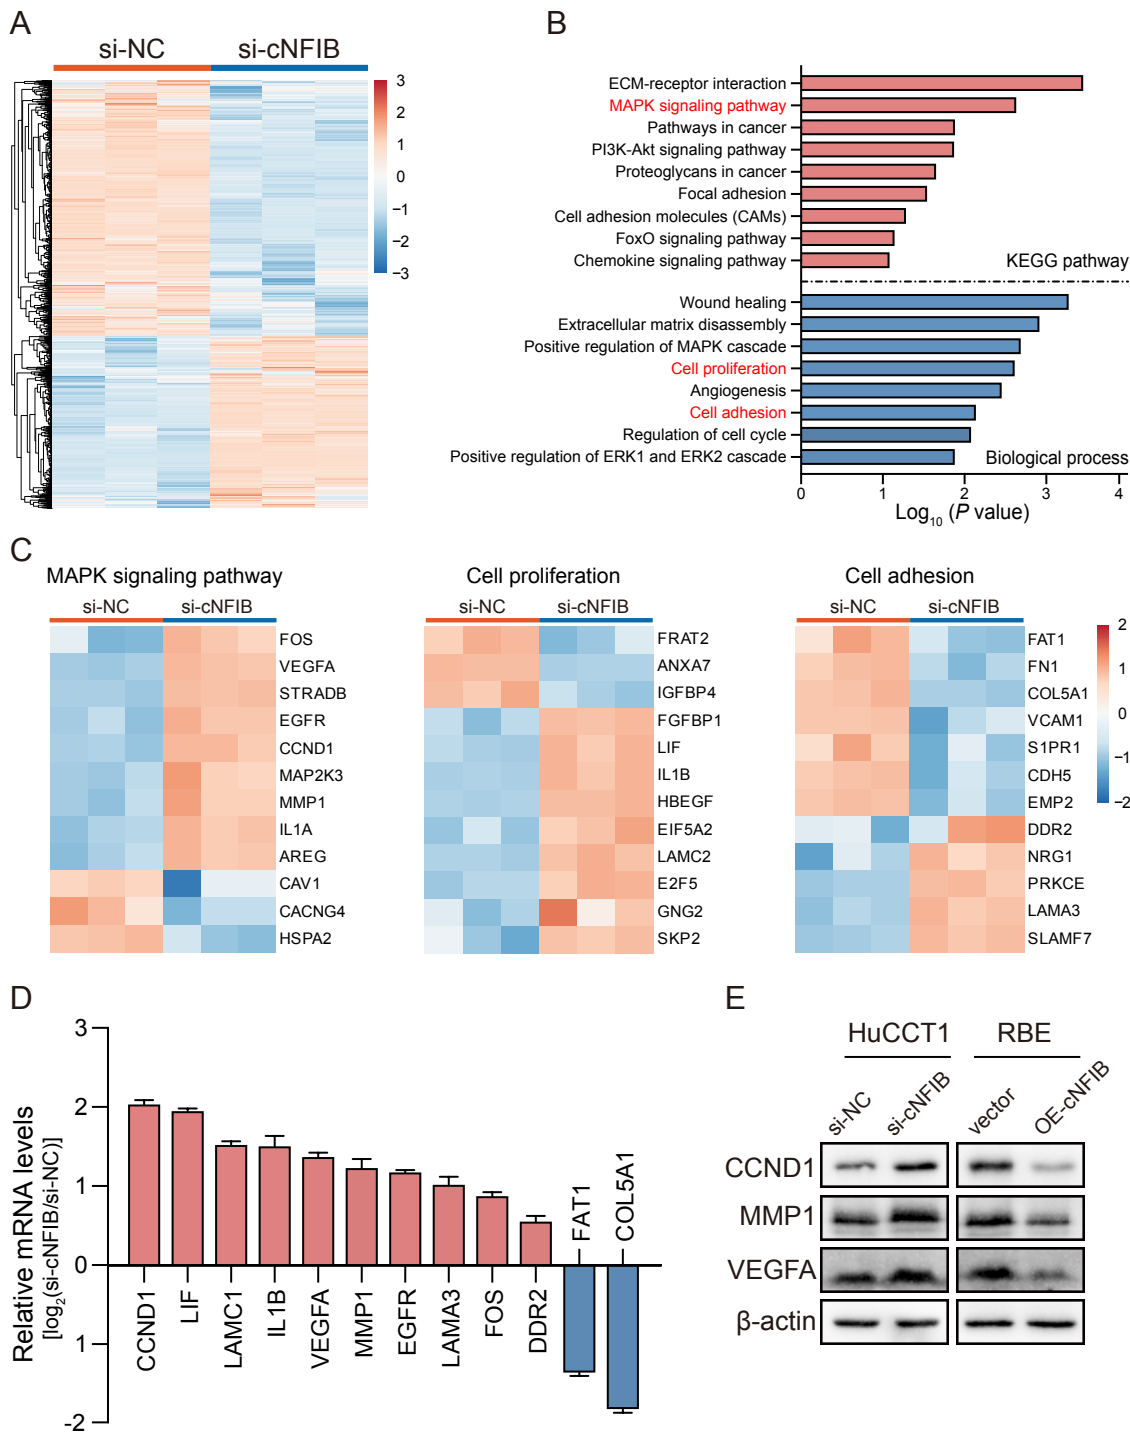

Supplement: 12943_2021_1482_MOESM13_ESM.pdf [file 12943_2021_1482_MOESM13_ESM.pdf]
