# Supplementary material for: CircNFIB inhibits tumor growth and metastasis through suppressing MEK1/ERK signaling in intrahepatic cholangiocarcinoma
Source: PubMed Central journal article supplement (PMC8762882; doi:10.1186/s12943-021-01482-9), 2022-01-17

# Figure S6

## A

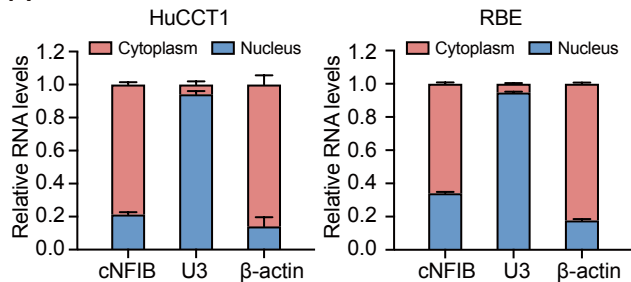

## B

protein-coding potential of cNFIB predicted by circRNADb

| Protein coding potential |                                                                                                                                     |          |                       |
|--------------------------|-------------------------------------------------------------------------------------------------------------------------------------|----------|-----------------------|
| Parameter Index          |                                                                                                                                     |          |                       |
| IRES Elements            | Position (start-end)                                                                                                                | R Score  | With Pseudoknot (Y/N) |
|                          | 1-48                                                                                                                                | 1.42027  | Y                     |
|                          | 14-157                                                                                                                              | 1.385700 | N                     |
| Open Reading Frame (ORF) | No open reading frame was found ! (Protein length less than 100aaa)                                                                 |          |                       |
| Protein Features         | The possibility of encoding protein is relatively low(R<1.6 or it has no open reading frame), so no protein features was predicted! |          |                       |

## C

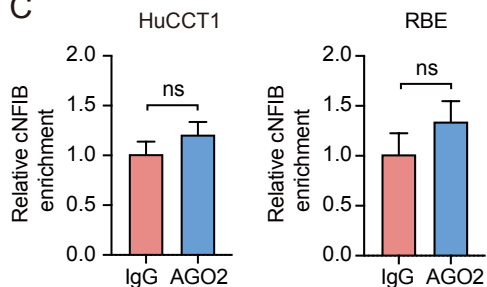

## D

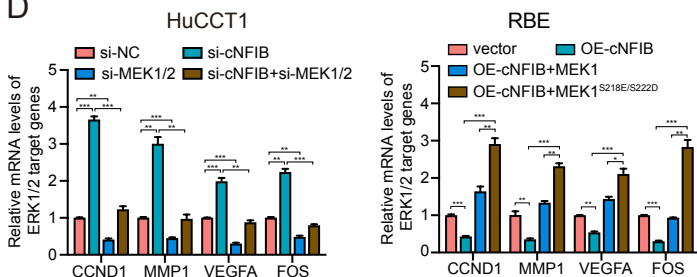

## E

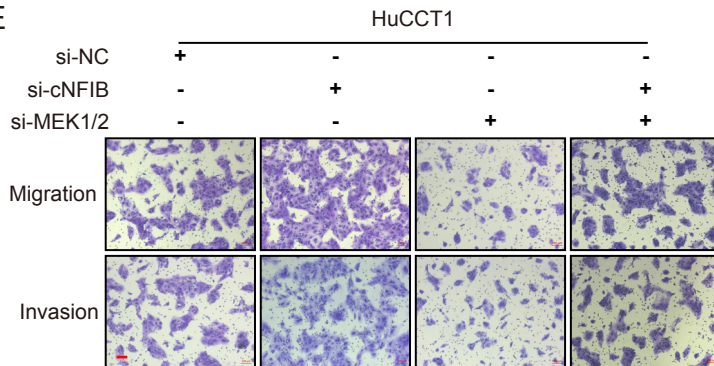

## F

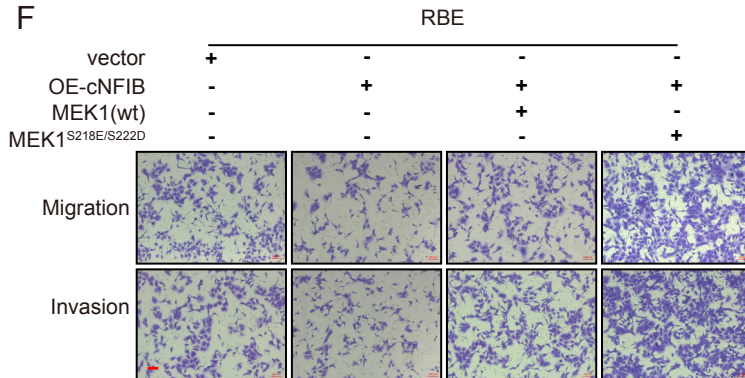

Supplement: 12943_2021_1482_MOESM15_ESM.pdf [file 12943_2021_1482_MOESM15_ESM.pdf]
