# Supplementary material for: CircNFIB inhibits tumor growth and metastasis through suppressing MEK1/ERK signaling in intrahepatic cholangiocarcinoma
Source: Springer Nature journal article supplement (doi:10.1186/s12943-021-01482-9), 2022-01-17

# Figure S2

## A

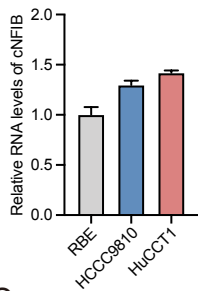

## B

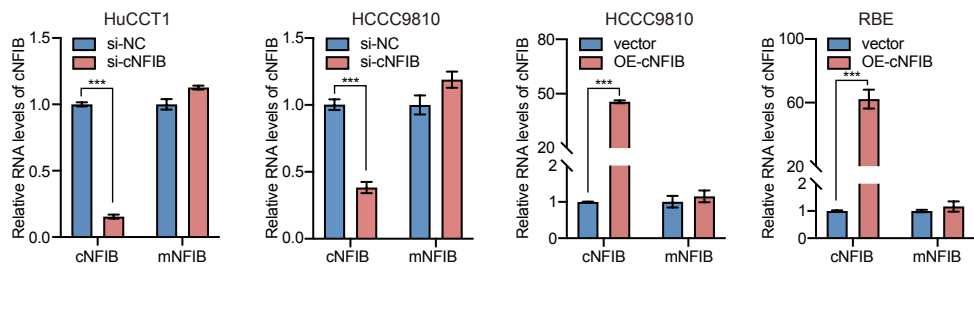

## C

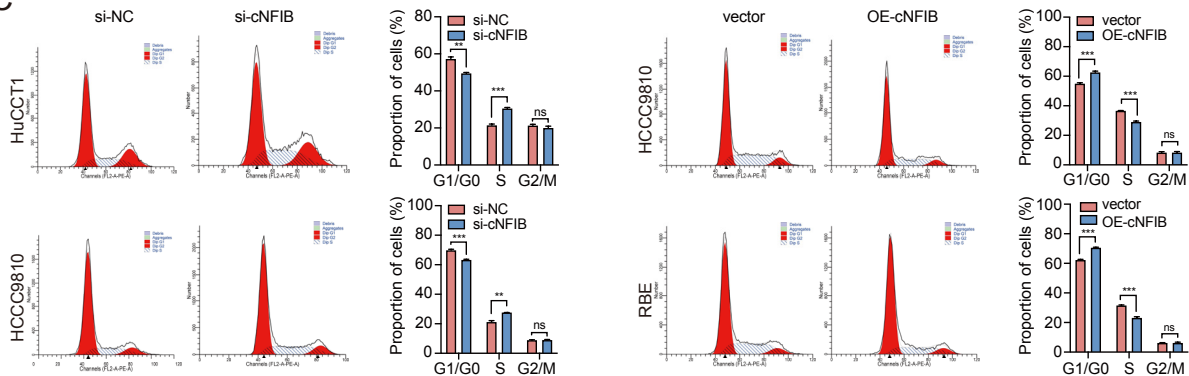

## D

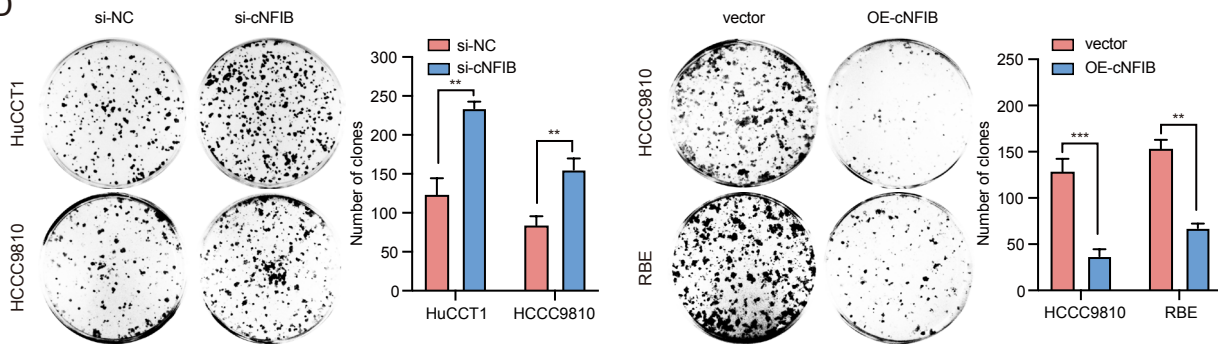

Supplement: MOESM11 [file 20041448]
