# Supplementary material for: CircNFIB inhibits tumor growth and metastasis through suppressing MEK1/ERK signaling in intrahepatic cholangiocarcinoma
Source: Springer Nature journal article supplement (doi:10.1186/s12943-021-01482-9), 2022-01-17

# Figure S3

## A

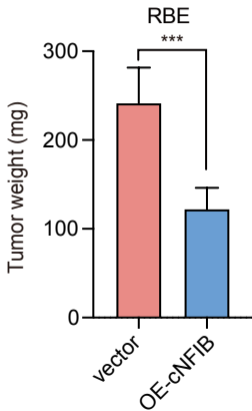

## B

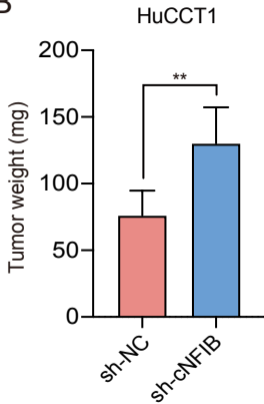

Supplement: MOESM12 [file 20041448]
